# Supplementary material
Source: PubMed Central journal article supplement (PMC2393790)

nurse
  forager

Relative mRNA levels

**brain *ilp1***

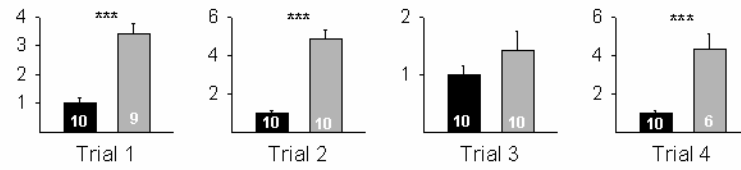

**brain *ilp2***

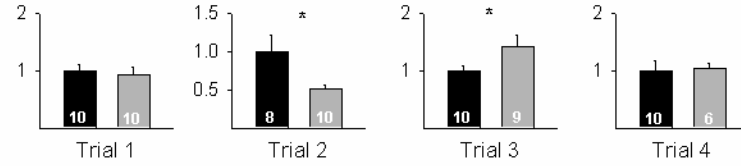

**brain *inR1***

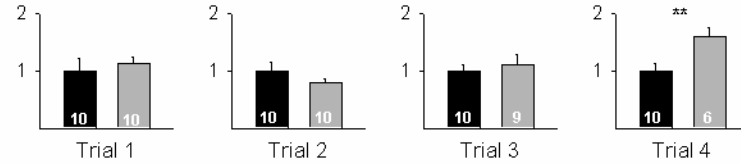

**brain *inR2***

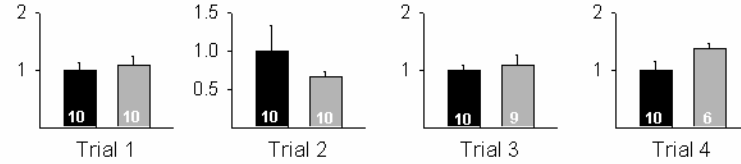

**brain *akh***

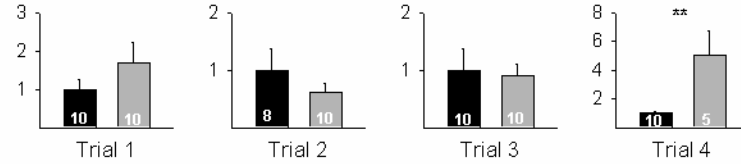

**abdomen *inR1***

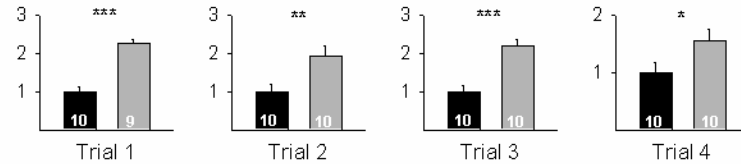

**abdomen *inR2***

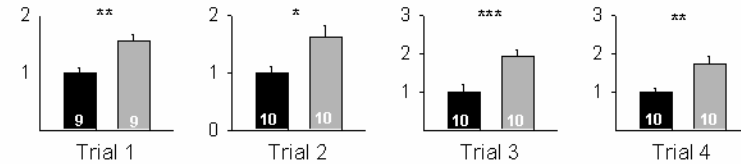

**abdomen *akhR***

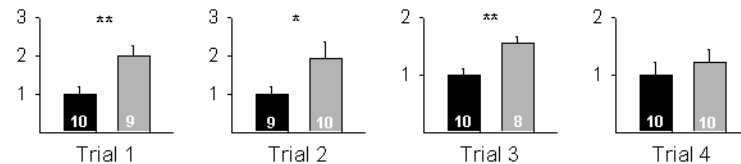

Supplement: pnas_0800630105_2.pdf [file pnas_0800630105_2.pdf]
