# Supplementary material
Source: PubMed Central journal article supplement (PMC2393790)

Bootstrap

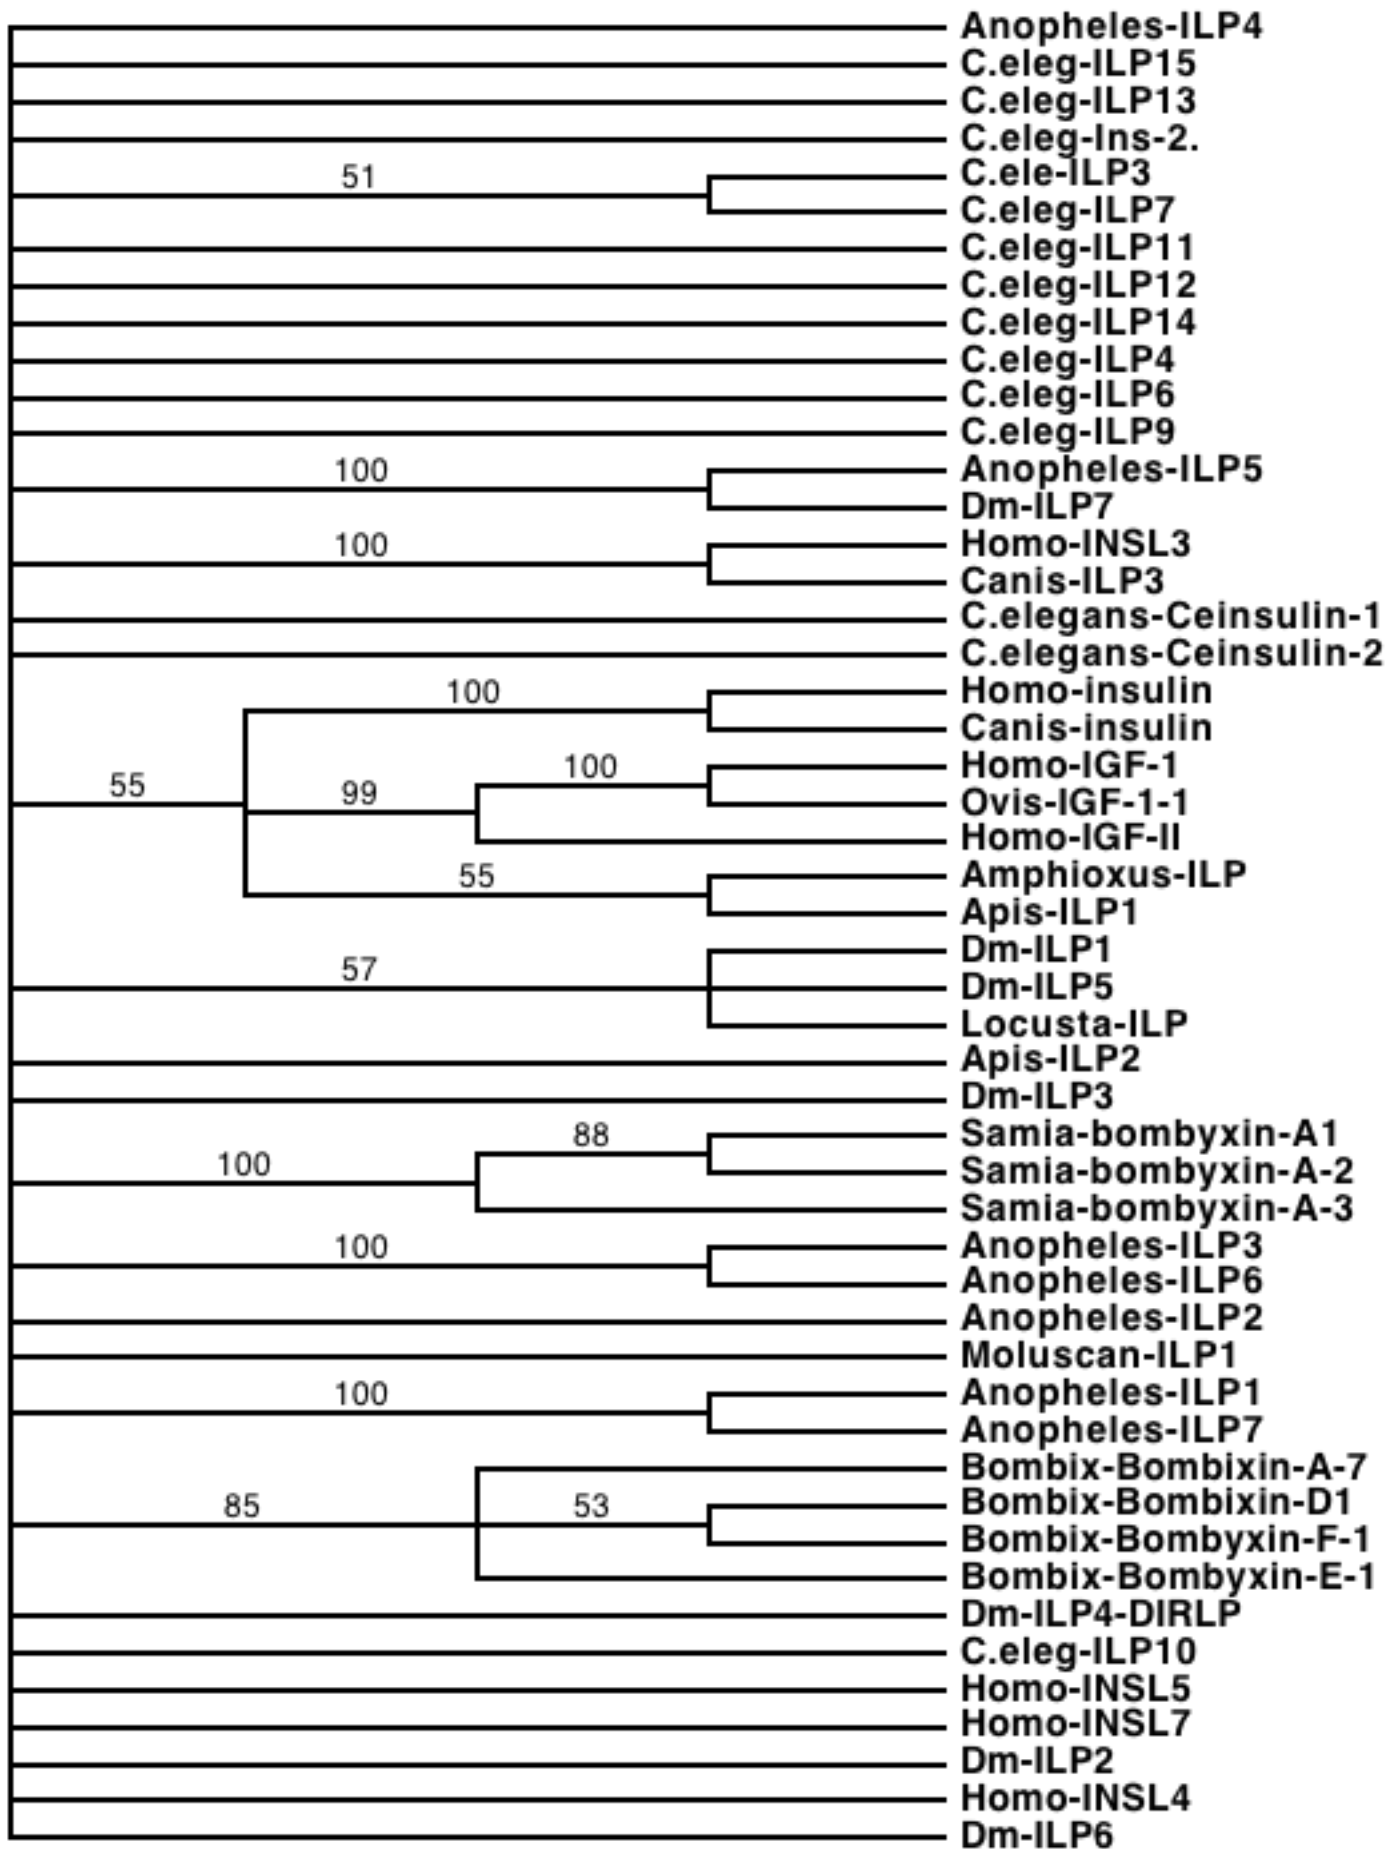

Supplement: pnas_0800630105_1.pdf [file pnas_0800630105_1.pdf]

■ pollen+sugar    □ sugar    ▒ colony-reared

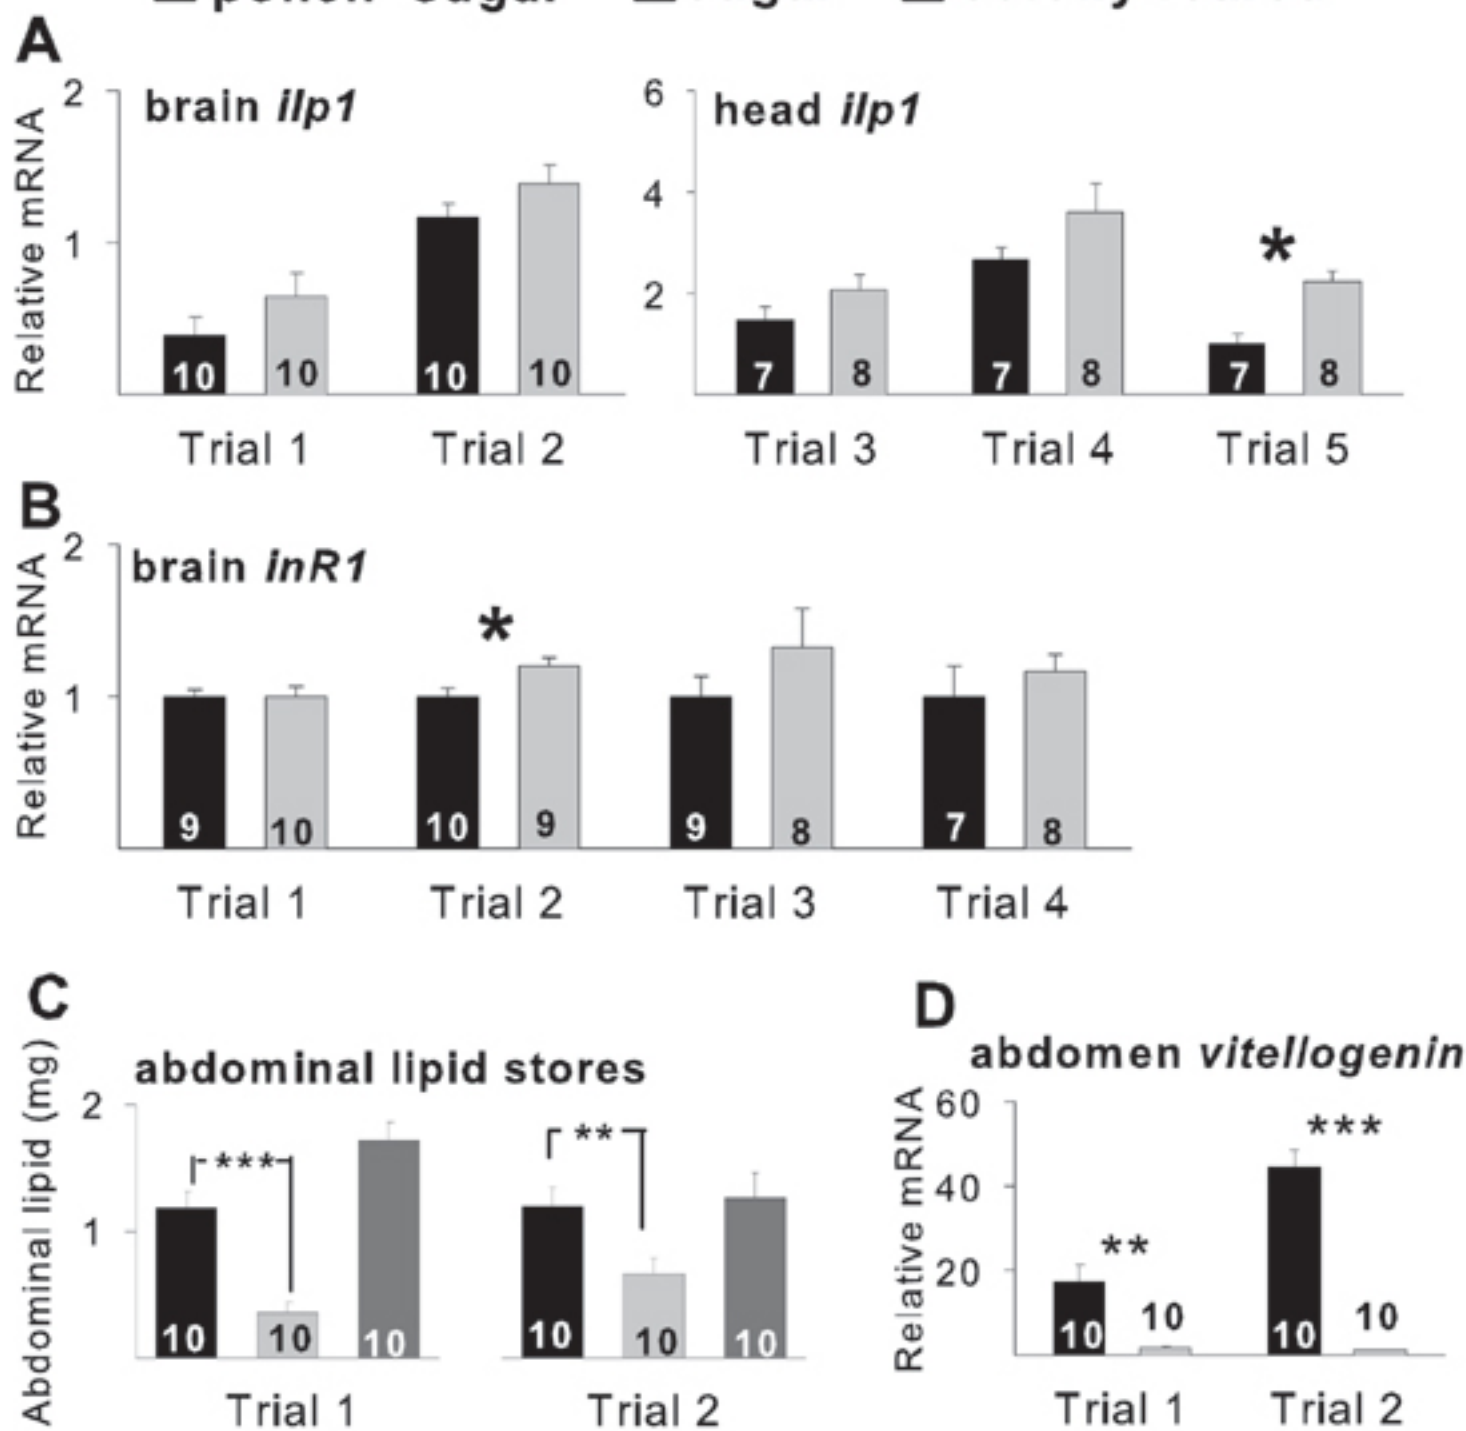

Supplement: pnas_0800630105_3.pdf [file pnas_0800630105_3.pdf]
